# Supplementary material
Source: publisher site journal article supplement (https://www.dovepress.com/article/supplementary_file/593688/593688%20Revised%20Supplementary%20Material.docx)
Supplement: Supplementary file 1 [file 593688%20Revised%20Supplementary%20Material.docx]

**Association of the Systemic Inflammation Response Index (SIRI) with the One-Year All-Cause Mortality in Elderly Patients with Acute Coronary Syndrome: A Retrospective Cohort Study**

**Supplementary Table S1.** The incidence and distribution of MACCE

| **Type of MACCE** | **Low SIRI Group (n, %)** | **High SIRI Group (n, %)** |
| --- | --- | --- |
| all-cause mortality | 45 (9.34) | 87 (18.10) |
| recurrent myocardial infarction | 20 (4.15) | 13 (2.70) |
| ischemic stroke | 24 (4.98) | 31 (6.44) |
| heart failure rehospitalization | 12 (2.49) | 28 (5.82) |
| revascularization or in-stent thrombosis of the same vessel | 2 (0.42) | 2 (0.42) |
| malignant arrhythmia | 5 (1.04) | 13 (2.70) |

**Abbreviations:** MACCE, major adverse cardiovascular and cerebrovascular events; SIRI, systemic inflammation response index.

**Supplementary Table S2.** Association between SIRI and one-year all-cause mortality in patients aged ≥ 65 years (N = 769)

| **Groups** | **Medel 0a**  **HR (95% CI)** | **Model 1b**  **HR (95% CI)** | **Model 2c**  **HR (95% CI)** | **Model 3d**  **HR (95% CI)** |
| --- | --- | --- | --- | --- |
| Continuous SIRI (per 1.0 × 10⁹/L increase) | 1.051 (1.036-1.067) *** | 1.046 (1.030-1.063) *** | 1.044 (1.028-1.061) *** | 1.027 (1.009-1.045) ** |
| Low SIRI group (SIRI≤2.93× 10⁹/L) | 1.0 (ref) | 1.0 (ref) | 1.0 (ref) | 1.0 (ref) |
| High SIRI group (SIRI>2.93× 10⁹/L) | 1.902 (1.307-2.768) *** | 1.725 (1.179-2.524) ** | 1.666 (1.130-2.456) ** | 1.524 (1.031-2.253) * |

**Notes:** ****P*< 0.001, ***P*< 0.01, **P*< 0.05. aModel 0: unadjusted. bModel 1: adjusted for demographics (age, sex, body mass index, smoking). cModel 2: adjusted for demographic, type of acute coronary syndrome, and comorbidities (hypertension, dyslipidemia, diabetes). dModel 3: adjusted for demographics, type of acute coronary syndrome, comorbidities, and treatments (PCI, aspirin, beta‑blockers, and statins).

**Abbreviations:** CI, confidence interval; HR, hazard ratio; ref, reference; SIRI, systemic inflammation response index.

**Supplementary Table S3.** Baseline characteristics of the cohort with missing and known outcomes

| **Characteristics** | **Patients with known outcomes (N = 963)** | **Patients with missing outcome data (N=21)** | ***P*-value** |
| --- | --- | --- | --- |
| **Age (years)** | 73.0 (66.0, 80.0) | 77.1 (9.2) | 0.05 |
| **Sex** |  |  | 1 |
| Female | 294 (31.0%) | 6 (28.6%) |  |
| Male | 669 (69.0%) | 15 (71.4%) |  |
| **BMI** |  |  | 0.007 |
| Missing | 562 (58.4%) | 19 (90.5%) |  |
| ＜25 (kg/m2) | 293 (30.4%) | 1 (4.8%) |  |
| ≥25 (kg/m2) | 108 (11.2%) | 1 (4.8%) |  |
| **Smoking** |  |  | 0.3 |
| Yes | 186 (19.3%) | 6 (28.6%) |  |
| No | 777 (80.7%) | 15 (71.4%) |  |
| **Drinking** |  |  | 1 |
| Yes | 57 (5.9%) | 1 (4.8%) |  |
| No | 906 (94.1%) | 20 (95.2%) |  |
| **Previous ACS** |  |  | 1 |
| Yes | 25 (2.6%) | 0 |  |
| No | 938 (97.4%) | 21 (100%) |  |
| **Hypertension** |  |  | 0.8 |
| Yes | 476 (49.4%) | 11 (52.4%) |  |
| No | 487 (50.6%) | 10 (47.6%) |  |
| **Dyslipidemia** |  |  | 1 |
| Yes | 185 (19.2%) | 4 (19%) |  |
| No | 778 (80.8%) | 17 (81%) |  |
| **Diabetes** |  |  | 0.2 |
| Yes | 284 (29.5%) | 3 (14.3%) |  |
| No | 679 (70.5%) | 18 (85.7%) |  |
| **Stroke** |  |  | 0.6 |
| Yes | 40 (4.2%) | 1 (4.8%) |  |
| No | 923 (95.8%) | 20 (95.2%) |  |
| **HF** |  |  | 0.6 |
| Yes | 61 (6.3%) | 2 (9.5%) |  |
| No | 902 (93.7%) | 19 (90.5%) |  |
| **AF** |  |  | 0.07 |
| Yes | 102 (10.6%) | 5 (23.8%) |  |
| No | 861 (89.4%) | 16 (76.2%) |  |
| **Type of ACS** |  |  | 0.5 |
| STEMI | 441 (45.8%) | 9 (42.9%) |  |
| NSTEMI | 446 (46.3%) | 12 (57.1%) |  |
| UA | 76 (7.9%) | 0 |  |
| **WBC (×109/L)** | 9.3 (7.4, 11.7) | 11.26 (4.4) | 0.2 |
| **RBC (×1012/L)** | 4.44 (3.99, 4.91) | 4.44 (0.73) | 0.9 |
| **Lymphocyte (×109/L)** | 1.33 (0.93, 1.88) | 1.41 (0.68-1.74) | 0.3 |
| **Monocyte (×109/L)** | 0.60 (0.43, 0.83) | 0.64 (0.26) | 0.9 |
| **Neutrophils (×109/L)** | 6.8 (5.0, 9.5) | 8.15 (5.67-10.64) | 0.1 |
| **PLT (×109/L)** | 230 (192, 272) | 250.38 (77.28) | 0.4 |
| **TC (mmol/L)** | 4.74 (3.89, 5.61) | 4.88 (1.14) | 0.7 |
| **TG (mmol/L)** | 1.21 (0.91, 1.64) | 1.09 (0.87-1.45) | 0.6 |
| **HDL-C (mmol/L)** | 1.08 (0.91, 1.27) | 1.21 (0.4) | 0.4 |
| **LDL-C (mmol/L)** | 3.00 (2.24, 3.81) | 3.01 (1.07) | 0.9 |
| **FPG (mmol/L)** | 6.3 (5.2, 8.5) | 6.71 (5.5-9.56) | 0.6 |
| **PCI** |  |  | 0.8 |
| Yes | 622 (64.6%) | 13 (61.9%) |  |
| No | 341 (35.4%) | 8 (38.1%) |  |
| **Aspirin** |  |  | 0.07 |
| Yes | 433 (45.0%) | 5 (23.8%) |  |
| No | 530 (55.0%) | 16 (76.2%) |  |
| **Clopidogrel/ ticagrelor** |  |  | <0.001 |
| Yes | 818 (84.9%) | 9 (42.9%) |  |
| No | 145 (15.1%) | 12 (57.1%) |  |
| **Nitric acid ester** |  |  | 0.4 |
| Yes | 65 (6.7%) | 0 |  |
| No | 898 (93.3%) | 21 (100%) |  |
| **ACEI** |  |  | 1 |
| Yes | 6 (0.6%) | 0 |  |
| No | 957 (99.4%) | 21 (100%) |  |
| **ARB** |  |  | 0.4 |
| Yes | 73 (7.6%) | 0 |  |
| No | 890 (92.4%) | 21 (100%) |  |
| **CCB** |  |  | 0.4 |
| Yes | 69 (7.2%) | 0 |  |
| No | 894 (92.8%) | 21 (100%) |  |
| **Beta-blockers** |  |  | 0.3 |
| Yes | 372 (38.6%) | 5 (23.8%) |  |
| No | 591 (61.4%) | 16 (76.2%) |  |
| **Statins** |  |  | <0.001 |
| Yes | 790 (82.0%) | 9 (42.9%) |  |
| No | 173 (18.0%) | 12 (57.1%) |  |
| **Ezetimibe** |  |  | 0.3 |
| Yes | 136 (14.1%) | 1 (4.8%) |  |
| No | 827 (85.9%) | 20 (95.2%) |  |

**Notes:** Continuous variables are presented as mean ± SD or median (first quartile to third quartile). Categorical variables are presented as number (percentage, %).

**Abbreviations:** ACEI, angiotensin-converting enzyme inhibitor; ACS, acute coronary syndrome; AF, atrial fibrillation; ARB, angiotensin II receptor blocker; BMI, body mass index; CCB, calcium channel blocker; FPG, fasting plasma glucose; HDL-C, high-density lipoprotein cholesterol; HF, heart failure; LDL-C, low-density lipoprotein cholesterol; PCI, percutaneous coronary intervention; PLT, platelet; RBC, red blood cell; SIRI, systemic inflammation response index; STEMI, ST elevation myocardial infarction; TC, total cholesterol; TG, triglyceride; UA, unstable angina; NSTEMI, non-ST elevation myocardial infarction; WBC, white blood cell.


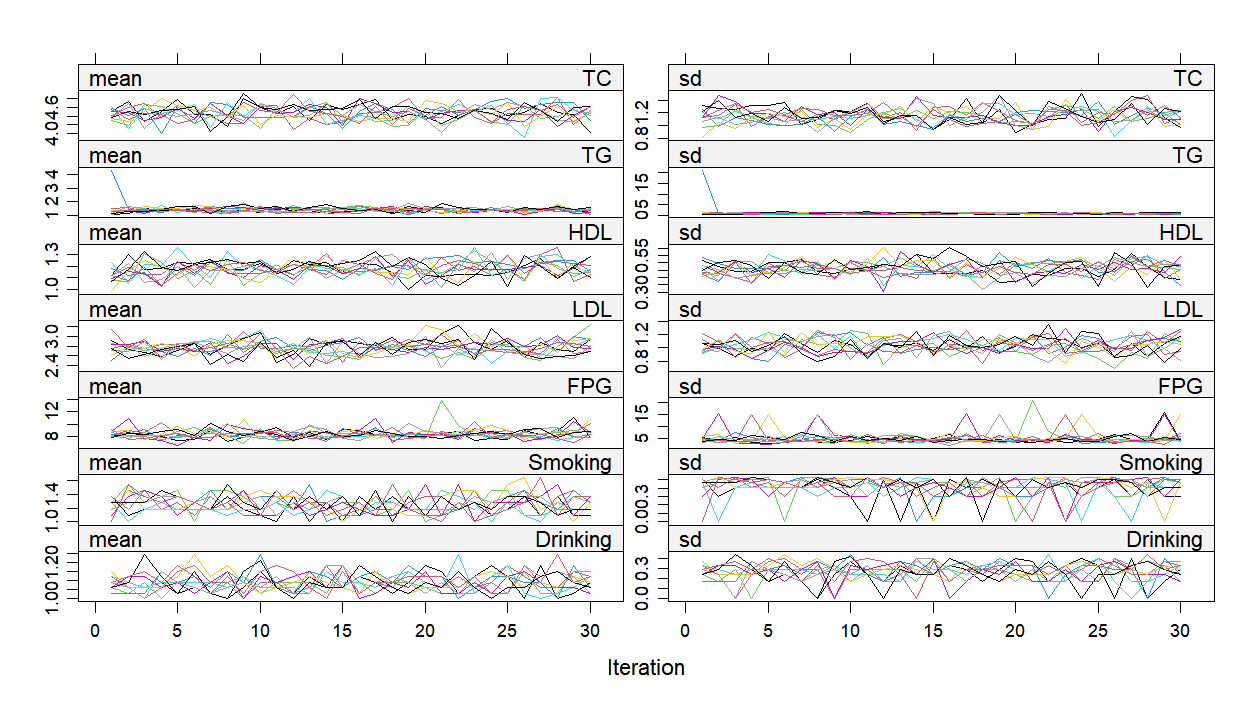


**
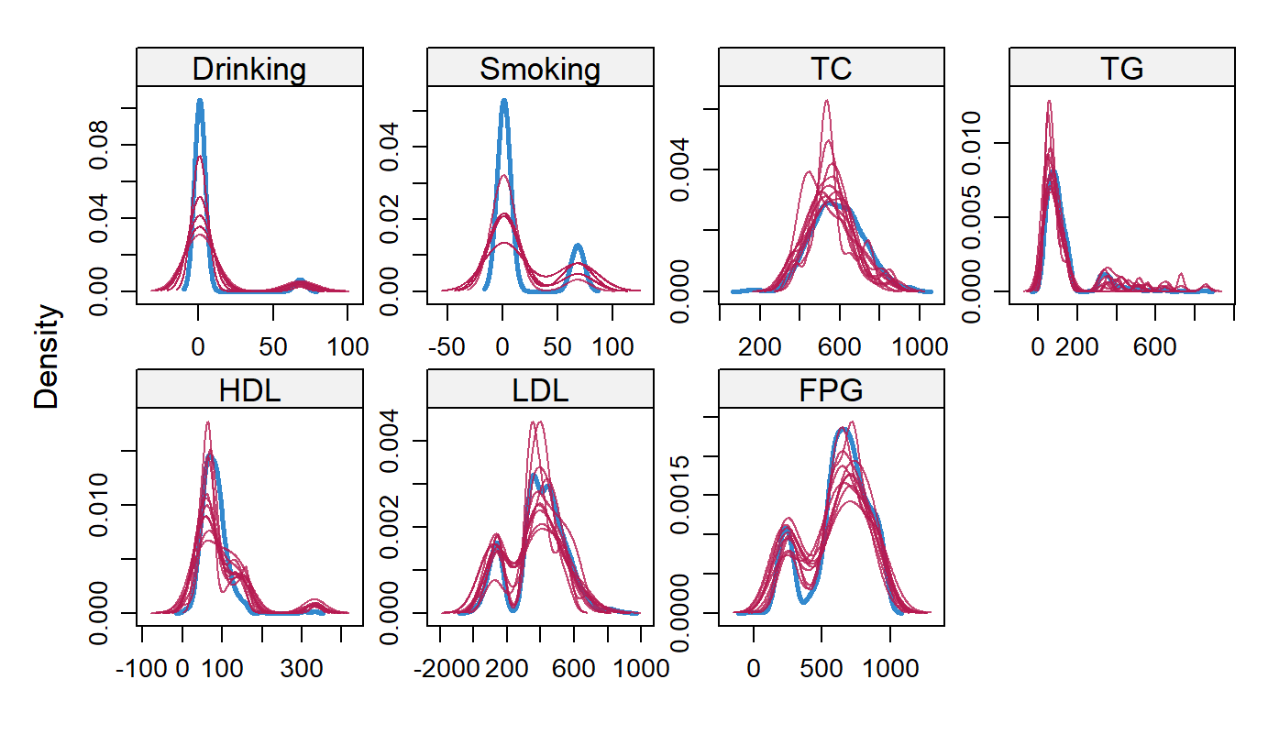
**

**Supplementary Figure S1.** Diagnostic plots for multiple imputation.

**Abbreviations:** FPG, fasting plasma glucose; HDL, high-density lipoprotein; LDL, low-density lipoprotein; TC, total cholesterol; TG, triglycerides.


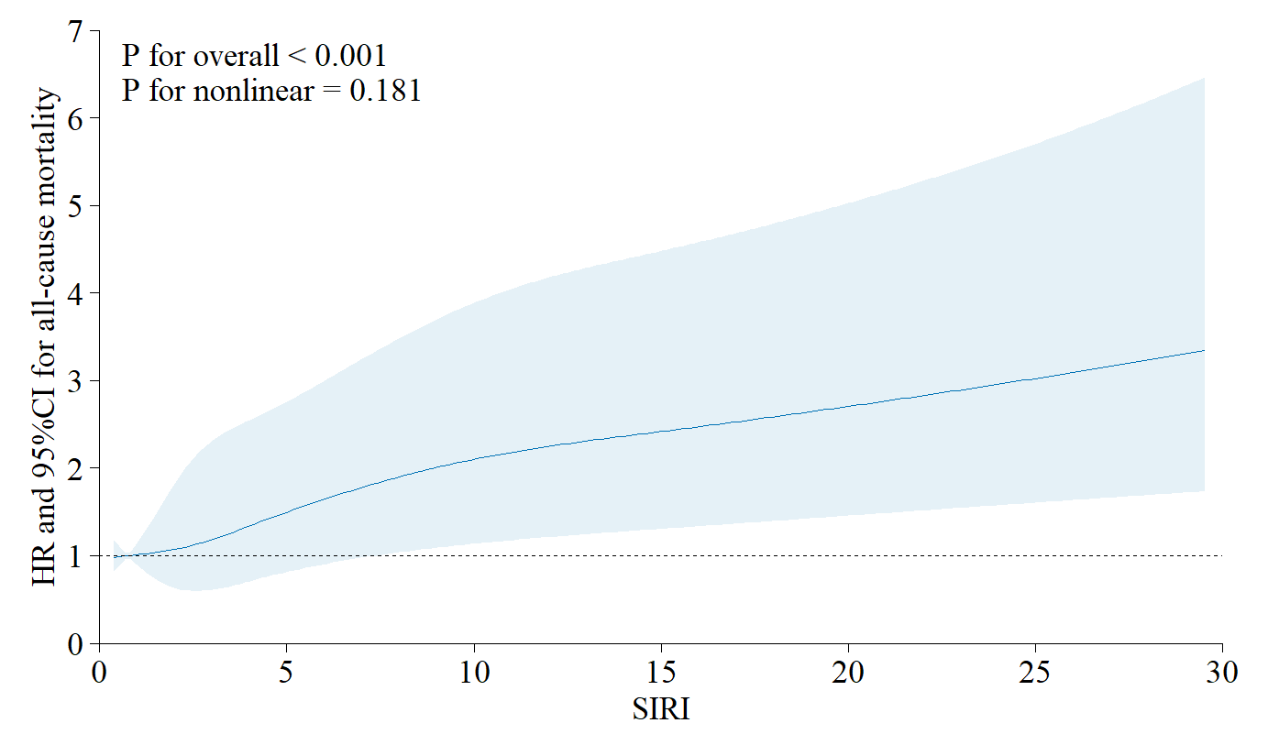


**Supplementary Figure S2.** The association of SIRI with all-cause mortality visualized by restricted cubic spline.

**Abbreviations:** CI, confidence interval; HR, hazard ratio; SIRI, systemic inflammation response index.

**
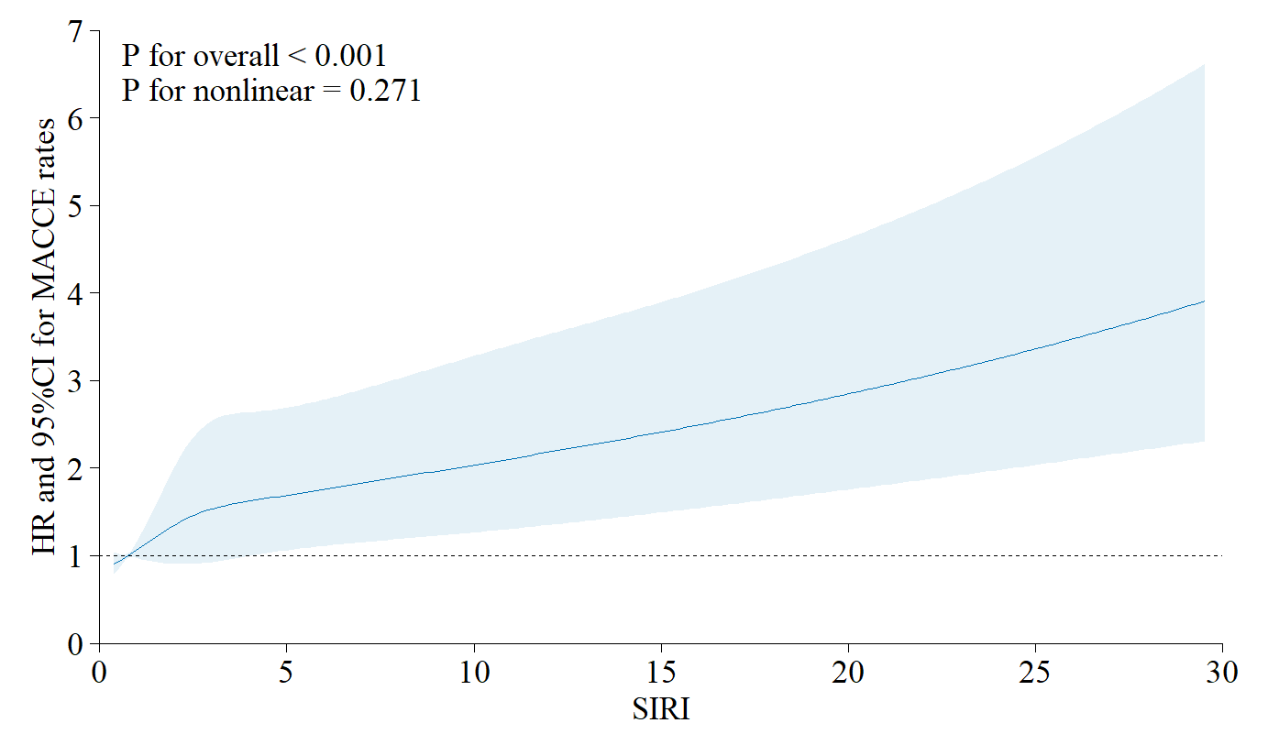
**

**Supplementary Figure S3.** The association of SIRI with MACCE visualized by restricted cubic spline.

**Abbreviations:** CI, confidence interval; HR, hazard ratio; MACCE, major adverse cardiovascular and cerebrovascular events; SIRI, systemic inflammation response index.

**
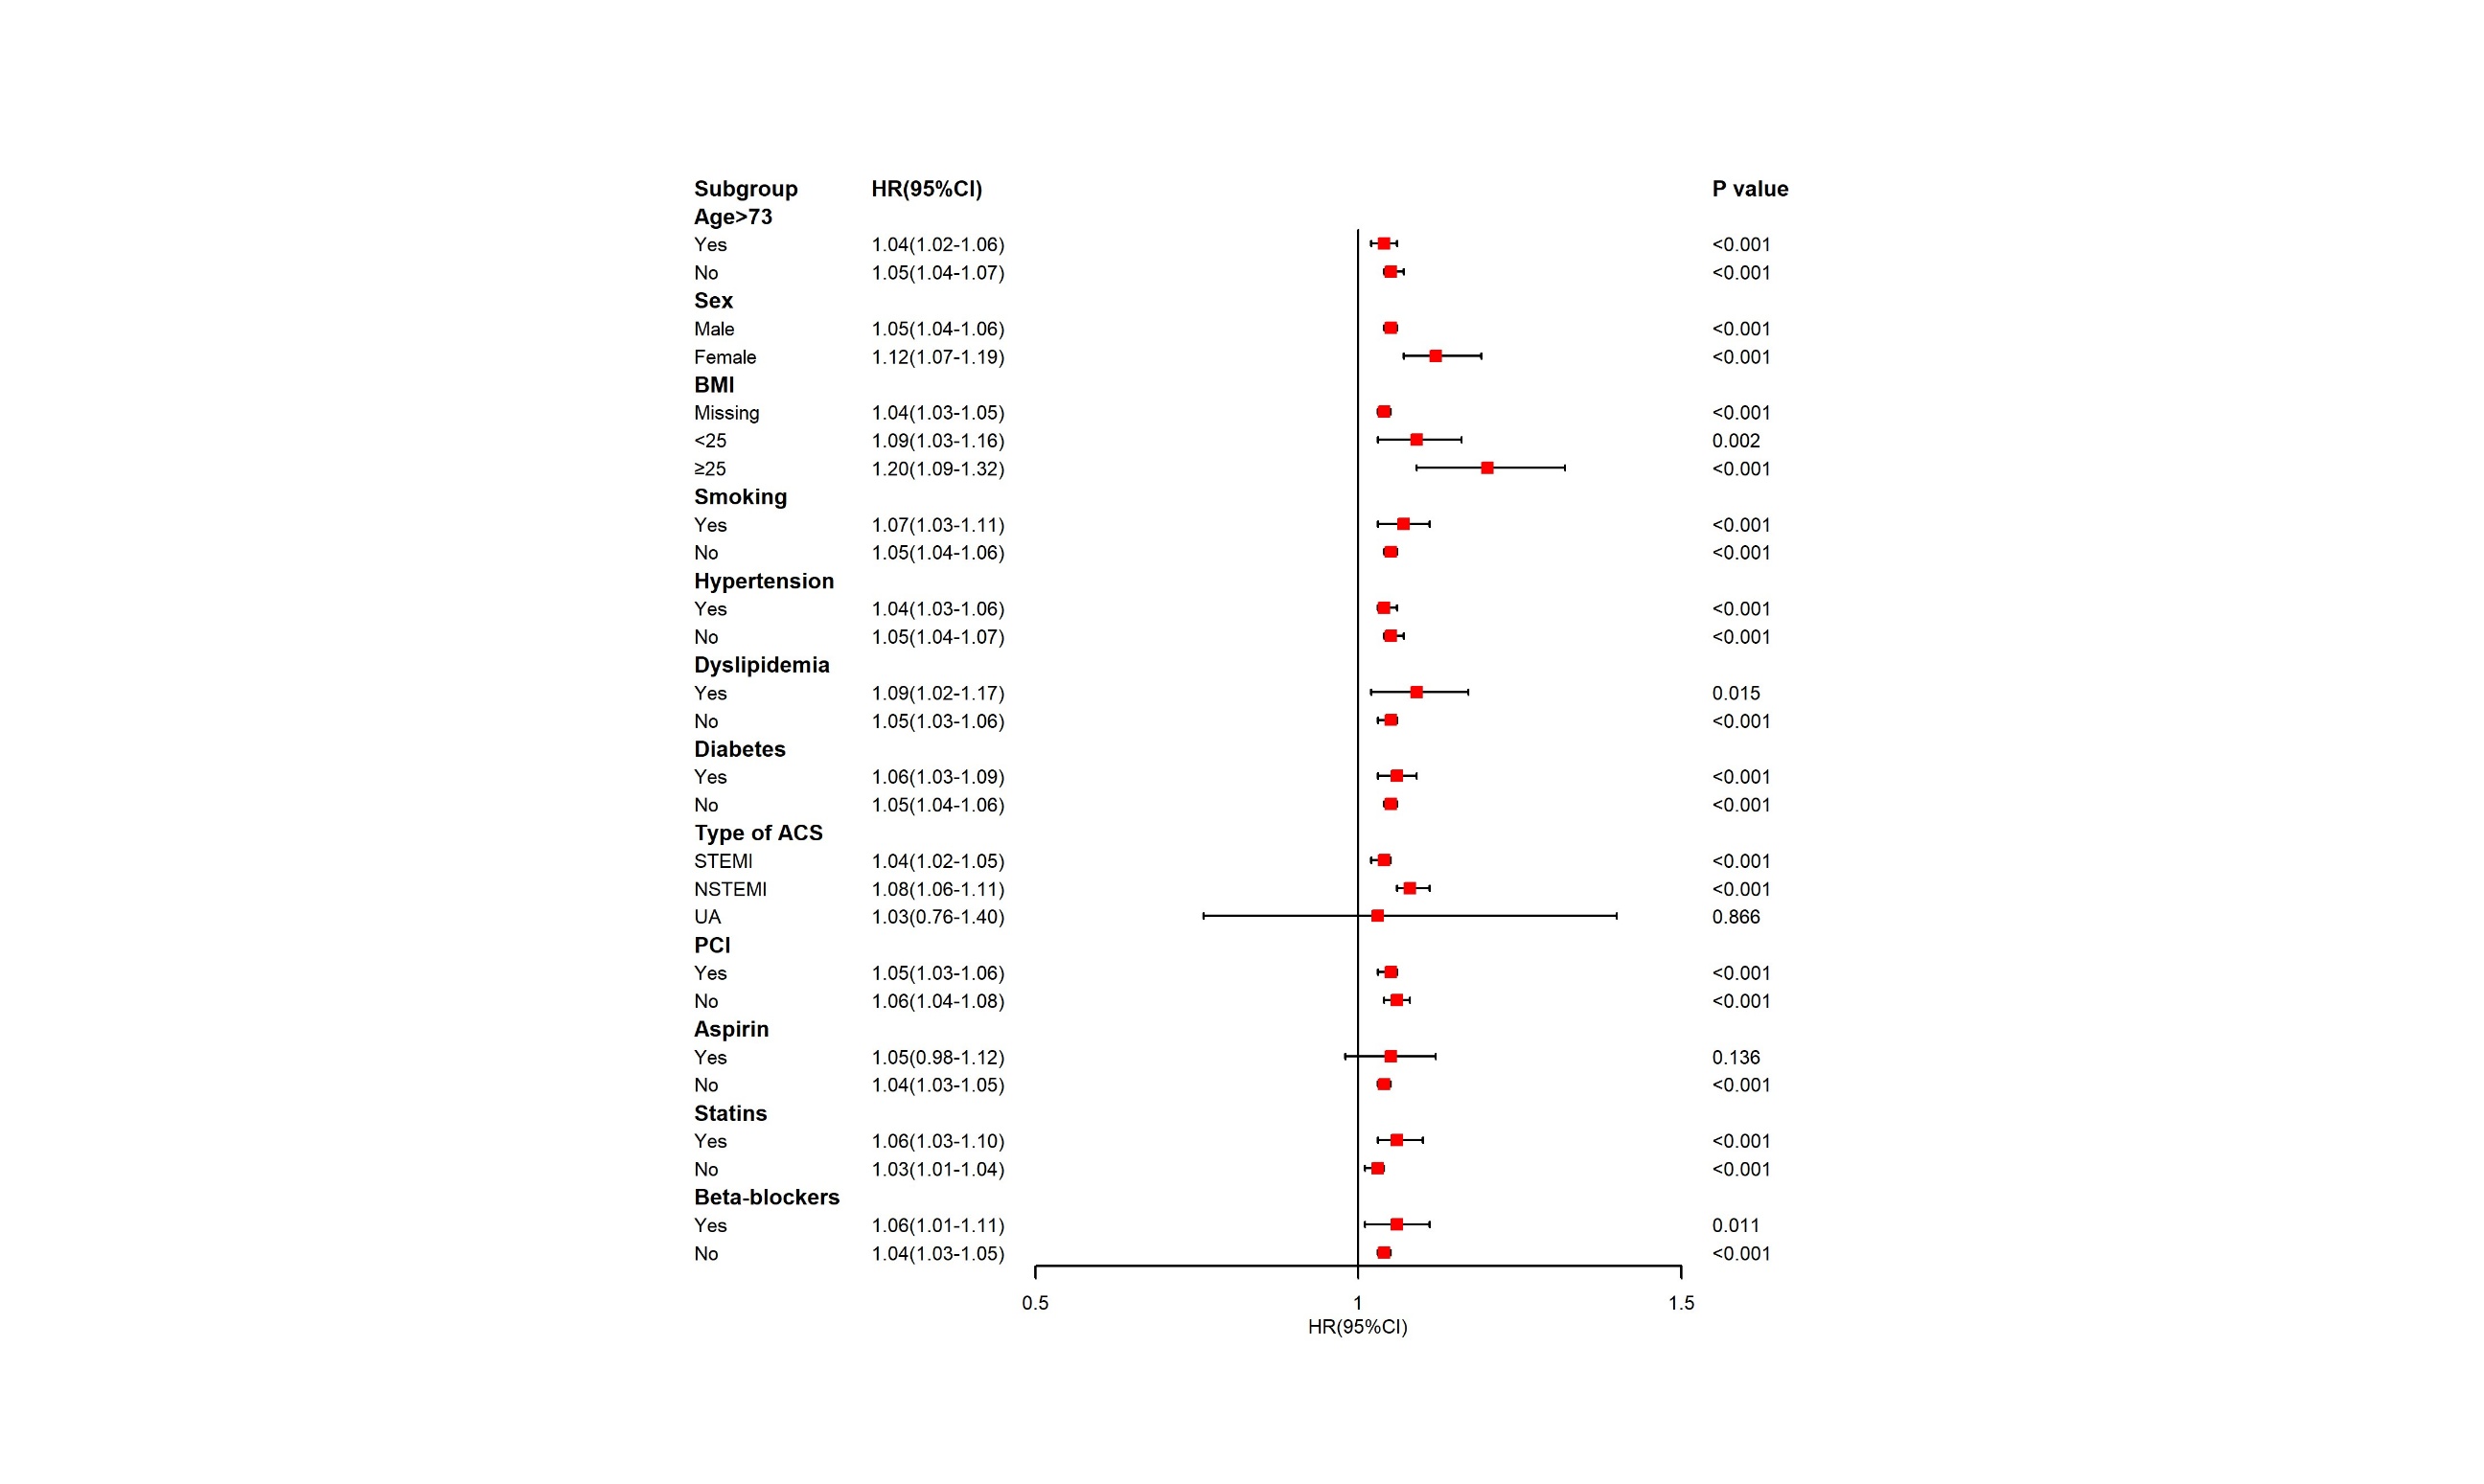
**

**Supplementary Figure S4.** Association between SIRI and one-year all-cause mortality in subgroups.

**Abbreviations:** ACS, acute coronary syndrome; BMI, body mass index; CI, confidence interval; HR, hazard ratio; PCI, percutaneous coronary intervention; STEMI, ST elevation myocardial infarction; UA, unstable angina; NSTEMI, non-ST elevation myocardial infarction.
